# Supplementary material for: Proteasome 26S Subunit, non-ATPase 3 (PSMD3) Regulates Breast Cancer by Stabilizing HER2 from Degradation
Source: PubMed Central journal article supplement (PMC6549480; doi:10.3390/cancers11040527), 2019-04-12
Supplement: cancers-11-00527-s001.pdf [file cancers-11-00527-s001.pdf]

# Supplementary Materials: Proteasome 26S subunit, non-ATPase 3 (PSMD3) regulates breast cancer by stabilizing HER2 from degradation

Abdulfattah Salah Fararjeh, Li-Ching Chen, Yuan-Soon Ho, Tzu-Chun Cheng, Yun-Ru Liu, Hang-Lung Chang, Hui-Wen Chang, Chih-Hsiung Wu and Shih-Hsin Tu

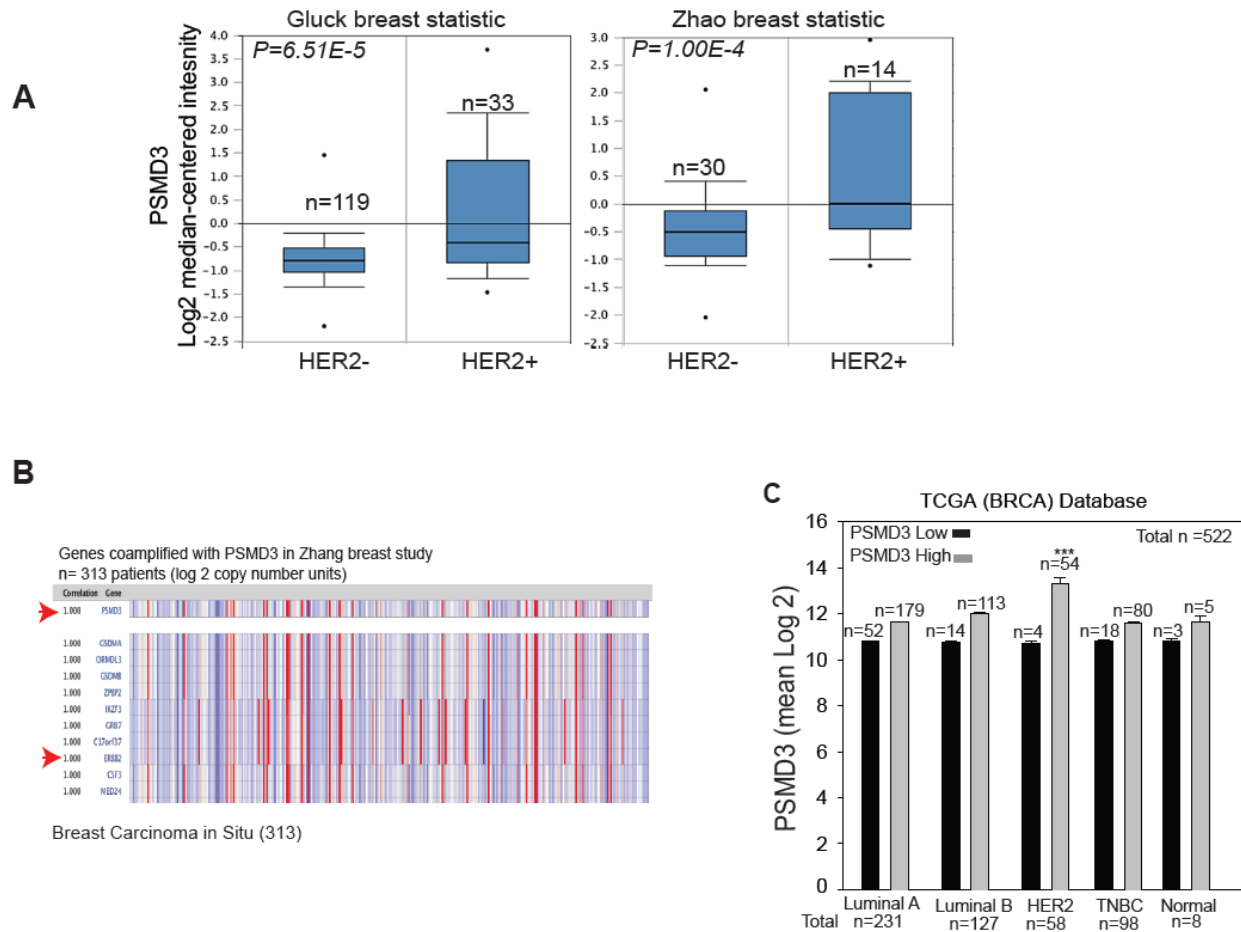

**Figure S1.** Correlation between PSMD3 and HER2 mRNA expression according to Oncomine (A and B) and TCGA (C) databases.

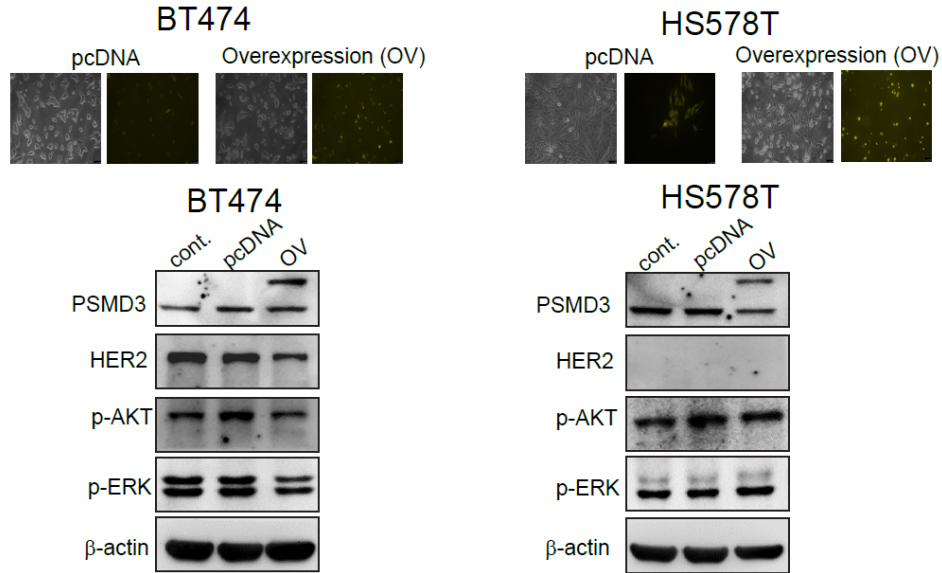

**Figure S2.** PSMD3 overexpression and its relation to HER2 and HER2 signaling proteins in BT474 and HS578T cell lines.

**Table S1.** Correlation between PSMD3 H-score and Clinicopathological parameters of breast cancer ( $n = 59$ ).

| Parameters | Categories | PSMD3 Low H-Score (n) | PSMD3 High H-Score (n) | p-Value |
|------------|------------|-----------------------|------------------------|---------|
| Age        | ≤40        | 7                     | 6                      | 0.332   |
|            | >40        | 30                    | 16                     |         |
| HER2       | Positive   | 13                    | 8                      | 0.571   |
|            | Negative   | 14                    | 24                     |         |
| ER         | Positive   | 7                     | 10                     | 0.074   |
|            | Negative   | 30                    | 12                     |         |
| TNBC       | Positive   | 15                    | 7                      | 0.350   |
|            | Non-TNBC   | 22                    | 15                     |         |
| Tumor size | T1         | 2                     | 0                      | 0.726   |
|            | T2         | 20                    | 12                     |         |
|            | T3         | 3                     | 2                      |         |
|            | T4         | 1                     | 2                      |         |
| * NA=17    |            |                       |                        |         |
| Grade      | 1          | 0                     | 3                      | 0.167   |
|            | 2          | 13                    | 7                      |         |
|            | 3          | 16                    | 8                      |         |
| * NA (12)  |            |                       |                        |         |
| Node       | N0         | 11                    | 9                      | 0.389   |
|            | N1         | 9                     | 3                      |         |
|            | N2         | 2                     | 4                      |         |
|            | N3         | 6                     | 4                      |         |
| * NA (11)  |            |                       |                        |         |
| Stage      | I          | 3                     | 3                      | 0.819   |
|            | II         | 15                    | 9                      |         |
|            | III        | 10                    | 8                      |         |
| * NA (11)  |            |                       |                        |         |

ER, Estrogen receptor; HER2, human epidermal growth factor2; TNBC, triple-negative BC; \*NA, not given. Clinicopathological parameters were assessed using Chi-square analysis. \*  $p < 0.05$ , \*\*  $p < 0.001$ . PSMD3 low vs PSMD3 high based on the mean level of PSMD3 H-score.

**Table S2.** Univariate and multivariate analysis of OS in HER2 positive vs total patients according to PSMD3 H-score.

| Parameters                  | Univariate Analysis (HER2 Positive) |                      | Univariate Analysis ( Total Patients) |                      |
|-----------------------------|-------------------------------------|----------------------|---------------------------------------|----------------------|
|                             | <i>p</i> -value                     | HR ratio (95% CI)    | <i>p</i> -value                       | HR ratio (95% CI)    |
| PSMD3 (high vs low)         | 0.049*                              | 9.072 (0.913–90.190) | 0.335                                 | 1.991 (0.490–8.086)  |
| Stage (3&4 vs 1&2)          | 0.556                               | 1.722 (0.282–10.526) | 0.608                                 | 1.441 (0.358–5.807)  |
| Tumor size (>5 vs ≤5)       | 0.157                               | 5.857 (0.507–67.617) | 0.059                                 | 4.386 (0.943–20.395) |
| Grade (high vs low)         | 0.486                               | 0.497 (0.070–3.540)  | 0.481                                 | 0.598 (0.143–2.503)  |
| Node (Positive vs negative) | 0.656                               | 1.099 (0.490–2.466)  | 0.150                                 | 4.663 (0.573–37.936) |
| ER(positive vs negative)    | 0.649                               | 0.607 (0.067–5.486)  | 0.698                                 | 1.374 (0.275–6.864)  |
| Parameters                  | Univariate analysis (OS)            |                      | Multivariate analysis ( OS)           |                      |
|                             | <i>p</i> -value                     | HR ratio (95% CI)    | <i>p</i> -value                       | HR ratio (95% CI)    |
| Stage (3&4 vs 1&2)          | <0.001***                           | 1.531 (1.252–1.873)  | <0.001***                             | 1.508 (1.214–1.873)  |
| Tumor size (>5 vs ≤5)       | 0.512                               | 1.1611 (0.743–1.814) | 0.466                                 | 1.280 (0.660–2.483)  |
| Node (Positive vs negative) | 0.013*                              | 1.597 (1.102–2.315)  | 0.237                                 | 1.277 (0.852–1.914)  |
| ER(positive vs negative)    | 0.448                               | 1.226 (0.724–2.077)  | 0.206                                 | 1.422 (0.824–2.457)  |
| HER2 (positive vs negative) | 0.004*                              | 2.139 (1.268–3.609)  | 0.028*                                | 1.823 (1.067–3.113)  |
| PSMD3 (high vs low)         | 0.054                               | 1.407 (0.991–1.996)  | 0.022*                                | 1.518 (1.063–2.169)  |

CI, confidence interval; ER, Estrogen receptor; HER2, human epidermal growth factor2. \* $p < 0.05$ . Cox regression analysis, hazard ratio (95% confidence interval).

**Table S3.** Univariate and multivariate analysis of overall survival (OS) according to TCGA database.

| Parameters                  | Multivariate Analysis (HER2 Positive) |                       | Multivariate Analysis ( Total Patients) |                      |
|-----------------------------|---------------------------------------|-----------------------|-----------------------------------------|----------------------|
|                             | <i>p</i> -value                       | HR ratio (95% CI)     | <i>p</i> -value                         | HR ratio (95% CI)    |
| PSMD3 (high vs low)         | 0.059                                 | 9.934 (0.919–107.373) | 0.232                                   | 2.556 (0.548–11.918) |
| Stage (3 vs 1&2)            | 0.864                                 | 0.836 (0.107–6.519)   | 0.844                                   | 0.845 (0.159–4.502)  |
| Tumor size (>5 vs ≤5)       | 0.744                                 | 1.914 (0.039–94.475)  | 0.107                                   | 4.040 (0.739–22.073) |
| Grade ( high vs low)        | 0.325                                 | 3.999 (0.254–63.001)  | 0.561                                   | 0.635 (0.138–2.932)  |
| Node (Positive vs negative) | 0.441                                 | 0.388 (0.035–4.316)   | 0.127                                   | 5.144 (0.627–42.205) |
| ER(positive vs negative)    | 0.604                                 | 0.524 (0.046–6.029)   | 0.490                                   | 2.085 (0.259–16.806) |

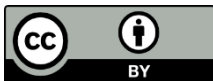

© 2019 by the authors. Licensee MDPI, Basel, Switzerland. This article is an open access article distributed under the terms and conditions of the Creative Commons Attribution (CC BY) license (<http://creativecommons.org/licenses/by/4.0/>).
